# Supplementary material for: Integrative functional genomics identifies an enhancer looping to the SOX9 gene disrupted by the 17q24.3 prostate cancer risk locus
Source: HighWire-hosted journal article supplement (doi:10.1101/gr.135665.111), 2012-06-04
Supplement: SuppLegends.pdf [file SuppLegends.pdf]

## **SUPPLEMENTARY INFORMATION**

### **Figure S1: RT-PCR of *LINC00600* in LNCaP cells.**

DNA gel after RT-PCR performed in LNCaP cells shows that the expression level *LINC00600* is undetectable by published RT-PCR primers (Gudmundsson et al. 2007).

### **Figure S2: The enrichment of H3K4me3 and H3K36me3 within *AR* gene**

In PCa LNCaP and VCaP cells, the *AR* gene is enriched with H3K4me3 at the promoter region and H3K36me3 at the gene body.

### **Figure S3: H3K36me3 enrichment in 17q24.3 risk locus**

Heatmap depicting H3K36me3 enrichment across 10 cell lines from the ENCODE project reveals that the 17q24.3 risk locus is deprived of transcription.

### **Figure S4: Enhancer chromatin signature of 17q24.3 risk locus**

Heatmap depicting chromatin signatures across multiple cell lines: enhancer signature H3K4me1 from H1-hESC, HMEC, HSMM, HSMMtube, HUVEC, K562, NH-A, NHEK, NHLF, Osteobl, LNCaP and VCaP; enhancer signature H3K4me2, promoter signature H3K4me3, transcription signature H3K36me3 and repressive chromatin signature H3K9me3 from LNCaP and VCaP. Regulatory elements E1-E5 from Figure 1B-C are highlighted. PCa GWAS SNP rs1859962 resides in E1.

### **Figure S5: DNaseI hypersensitive sites of 17q24.3 risk locus**

Heatmap depicting DNaseI hypersensitive sites across 77 distinct cell lines including PCa LNCaP cells (Highlighted by a blue box) reveals that E1 is truly a PCa specific enhancer. E2~E5 contains DNaseI hypersensitivity shared by multiple cell lines. PCa GWAS SNP rs1859962 resides in E1.

### **Figure S6: 3C-qPCR validating rs6983267-*MYC* interaction in LNCaP cells**

Primers used in this validation are presented in Table S3.

### **Figure S7: Sequencing result of the 3C ligation product (between E1 and *SOX9*)**

**Figure S8: 3C-TaqMan assessing E1-SOX9 interaction using 3C data analysis pipeline from ‘Hagege et al. 2007’ (See the method section).**

**Figure S9: rs8072254 is in LD with rs1859962**

Within the E1 enhancer, 3 SNPs (rs8071558, rs8072254 and rs984434) are included in HapMap dataset. All of the 3 are in LD with PCa risk SNP rs1859962. Note the other SNPs covered by our study are not included in the HapMap dataset.

**Figure S10 and S11: DNA gel with regards to PCR amplicons of randomly ligated BAC templates.**

**Figure S12: Site-directed mutagenesis**

Mutagenesis of each SNP was performed in the Luciferase reporter plasmids harboring the two DHS regions within the E1 enhancer. Cycle-sequencing results are presented for each SNP.

**Figure S13: Luciferase assays using the E1 enhancer and the *SOX9* promoter**

Luciferase assays using pGL3 plasmid the *SOX9* promoter (approximately  $\pm 500$ bp surrounding the *SOX9* TSS) and harboring the two DHS regions within the E1 enhancer and either the reference or variant sequence for the two functional SNPs within them. The pGL3 plasmid with the *SOX9* promoter but without the enhancer region (Empty) is used as a negative control. The y axis represents the relative Luciferase units normalized to Renilla signal  $\pm 1$ SEM. The Luciferase expression level for each variant SNP is compared to the plasmid homozygous for the reference alleles. P value is derived from a *t* test (\*\*,  $p \leq 0.01$ ).

**Figure S14: *In vivo* ChIP-qPCR of FOXA1 and AP-1 in the E1 enhancer and the *SOX9* gene**

The y axis indicates the ChIP enrichment normalized to the input DNA (ChIP without antibodies).

**Figure S15: Luciferase assay for rs1859961 in MCF7 cells**

Same as Figure 4F but done in MCF7 cells.

**Table S1: LD analysis using genotype data from the 1000 genome project**

**Table S2: Primers used in this study**

**Table S3: Motif analysis for rs8072254 and rs1859961**

**References**

Gudmundsson, J., Sulem, P., Steinthorsdottir, V., Bergthorsson, J.T., Thorleifsson, G., Manolescu, A., Rafnar, T., Gudbjartsson, D., Agnarsson, B.A., Baker, A. et al. 2007. Two variants on chromosome 17 confer prostate cancer risk, and the one in TCF2 protects against type 2 diabetes. *Nat Genet* **39**(8): 977-983.
